# Supplementary material
Source: publisher site journal article supplement (https://www.spandidos-publications.com/6802/downloadSupplementary)
Supplement: Supplementary file 1 [file downloadSupplementary]

## Sheet: Sheet1
Table SIX. GO annotation analysis of biological process for targets of upregulated piwi-interacting RNAs.
Term	Overlap	P-value	Adjusted P-value	Odds Ratio	Combined Score	Genes
Positive Regulation Of Cell-Cell Adhesion Mediated By Integrin (GO:0033634)	45413	0.00249771	0.0263986	555.167	3326.77	PIEZO1
L-alanine Transport (GO:0015808)	45474	0.00349522	0.0263986	370.074	2093.27	SLC36A3
Positive Regulation Of Myotube Differentiation (GO:0010831)	45474	0.00349522	0.0263986	370.074	2093.27	PIEZO1
Glycerolipid Metabolic Process (GO:0046486)	45536	0.00449184	0.0263986	277.528	1500.17	DGKG
Lipid Phosphorylation (GO:0046834)	45536	0.00449184	0.0263986	277.528	1500.17	DGKG
Regulation Of Cell-Cell Adhesion Mediated By Integrin (GO:0033632)	45536	0.00449184	0.0263986	277.528	1500.17	PIEZO1
Positive Regulation Of Integrin Activation (GO:0033625)	45566	0.00498982	0.0263986	246.679	1307.49	PIEZO1
Glycine Transport (GO:0015816)	45566	0.00498982	0.0263986	246.679	1307.49	SLC36A3
Fatty Acid Beta-Oxidation Using acyl-CoA Dehydrogenase (GO:0033539)	45566	0.00498982	0.0263986	246.679	1307.49	GCDH
Alanine Transport (GO:0032328)	45627	0.00598509	0.0263986	201.808	1032.95	SLC36A3
acyl-CoA Biosynthetic Process (GO:0071616)	41275	0.0064824	0.0263986	184.981	932.06	GCDH
Suppression Of Viral Release By Host (GO:0044790)	41275	0.0064824	0.0263986	184.981	932.06	TRIM26
Regulation Of Integrin Activation (GO:0033623)	41640	0.00697947	0.0263986	170.744	847.705	PIEZO1
Regulation Of Protein Kinase C Signaling (GO:0090036)	42370	0.00797296	0.0263986	147.963	714.913	DGKG
Positive Regulation Of Cell Adhesion Mediated By Integrin (GO:0033630)	42736	0.00846937	0.0263986	138.708	661.819	PIEZO1
Detection Of Mechanical Stimulus (GO:0050982)	43101	0.00896555	0.0263986	130.542	615.425	PIEZO1
fatty-acyl-CoA Metabolic Process (GO:0035337)	43101	0.00896555	0.0263986	130.542	615.425	GCDH
Negative Regulation Of Viral Entry Into Host Cell (GO:0046597)	43101	0.00896555	0.0263986	130.542	615.425	TRIM26
Negative Regulation Of Viral Life Cycle (GO:1903901)	43831	0.00995725	0.0277755	116.789	538.336	TRIM26
Diacylglycerol Metabolic Process (GO:0046339)	44927	0.0114431	0.0285471	100.848	450.83	DGKG
Regulation Of Myotube Differentiation (GO:0010830)	44927	0.0114431	0.0285471	100.848	450.83	PIEZO1
Positive Regulation Of Striated Muscle Cell Differentiation (GO:0051155)	45658	0.0124326	0.0285471	92.4352	405.553	PIEZO1
fatty-acyl-CoA Biosynthetic Process (GO:0046949)	45658	0.0124326	0.0285471	92.4352	405.553	GCDH
L-amino Acid Transport (GO:0015807)	46023	0.012927	0.0285471	88.7333	385.851	SLC36A3
Fatty Acid Derivative Biosynthetic Process (GO:1901570)	46753	0.0139151	0.0293719	82.1523	351.183	GCDH
Phosphatidic Acid Biosynthetic Process (GO:0006654)	47119	0.0144088	0.0293719	79.2143	335.862	DGKG
Phosphatidic Acid Metabolic Process (GO:0046473)	12055	0.0163815	0.0321564	69.2986	284.928	DGKG
Neutral Amino Acid Transport (GO:0015804)	12785	0.0173666	0.0328724	65.2157	264.333	SLC36A3
Acylglycerol Metabolic Process (GO:0006639)	14977	0.0203163	0.0344618	55.4167	215.922	DGKG
Amino Acid Transmembrane Transport (GO:0003333)	15342	0.0208071	0.0344618	54.0623	209.354	SLC36A3
Lipid Modification (GO:0030258)	15342	0.0208071	0.0344618	54.0623	209.354	DGKG
Monoatomic Cation Transport (GO:0006812)	15342	0.0208071	0.0344618	54.0623	209.354	PIEZO1
Regulation Of Viral Entry Into Host Cell (GO:0046596)	16072	0.0217882	0.0347177	51.5426	197.222	TRIM26
Positive Regulation Of Cell-Cell Adhesion (GO:0022409)	16803	0.0227683	0.0347177	49.2469	186.271	PIEZO1
Cellular Response To Mechanical Stimulus (GO:0071260)	17533	0.0237476	0.0347177	47.1466	176.341	PIEZO1
Proton Transmembrane Transport (GO:1902600)	17899	0.0242369	0.0347177	46.162	171.717	SLC36A3
Fatty Acid Beta-Oxidation (GO:0006635)	17899	0.0242369	0.0347177	46.162	171.717	GCDH
Cytoplasmic Translation (GO:0002181)	33970	0.0455488	0.0635285	24.0314	74.2323	RPL41
Positive Regulation Of Protein-Containing Complex Assembly (GO:0031334)	35796	0.0479439	0.0651545	22.7869	69.2204	PIEZO1
Monoatomic Ion Transport (GO:0006811)	1/107	0.0522414	0.0681475	20.8428	61.5253	PIEZO1
Glycerophospholipid Biosynthetic Process (GO:0046474)	1/108	0.0527179	0.0681475	20.6469	60.7598	DGKG
Peptide Biosynthetic Process (GO:0043043)	1/158	0.0762662	0.0962406	14.0361	36.1222	RPL41
Macromolecule Biosynthetic Process (GO:0009059)	1/183	0.0878416	0.10827	12.0928	29.4123	RPL41
Defense Response To Virus (GO:0051607)	1/189	0.0906002	0.109132	11.7033	28.1031	TRIM26
Negative Regulation Of Intracellular Signal Transduction (GO:1902532)	1/231	0.109701	0.127951	9.54589	21.0964	DGKG
Translation (GO:0006412)	1/234	0.111052	0.127951	9.42155	20.7063	RPL41
Positive Regulation Of DNA-binding Transcription Factor Activity (GO:0051091)	1/246	0.116435	0.131299	8.95465	19.2563	TRIM26
Monoatomic Cation Transmembrane Transport (GO:0098655)	1/281	0.131969	0.14417	7.82143	15.8399	SLC36A3
Inorganic Cation Transmembrane Transport (GO:0098662)	1/284	0.133289	0.14417	7.73734	15.5926	SLC36A3
Gene Expression (GO:0010467)	1/296	0.138551	0.146864	7.41808	14.662	RPL41
Protein Modification By Small Protein Conjugation (GO:0032446)	1/364	0.167829	0.174411	6.00765	10.7225	TRIM26
Phosphorylation (GO:0016310)	1/429	0.194976	0.19703	5.0784	8.30258	DGKG
Protein Ubiquitination (GO:0016567)	1/434	0.19703	0.19703	5.01848	8.152	TRIM26
